# Supplementary material for: Modulation of biomimetic properties of cerium oxide nanoparticles by hypoxic tumor microenvironments: steering towards tumor specificity
Source: Royal Society of Chemistry journal article supplement (doi:10.1039/c8nj00097b), 2018-01-01
Supplement: c8nj00097b1.pdf [file c8nj00097b1.pdf]

**Modulation of biomimetic properties of cerium nanoparticles by hypoxic tumor  
microenvironment: Steering towards tumor specificity**

Preethi Sridharan<sup>a,†</sup>, G. Vinothkumar<sup>b,†</sup>, Pooja Pratheesh<sup>a,\*</sup>, K. Suresh Babu<sup>b,\*</sup>

<sup>a</sup> Central-Interdisciplinary Research Facility, Mahatma Gandhi Medical College and Research  
Institute, Pondicherry – 607 403, India.

<sup>b</sup> Centre for Nanoscience & Technology, Madanjeet School of Green Energy Technologies,  
Pondicherry University, Kalapet, Pondicherry – 605 014, India.

**Supplementary Information**

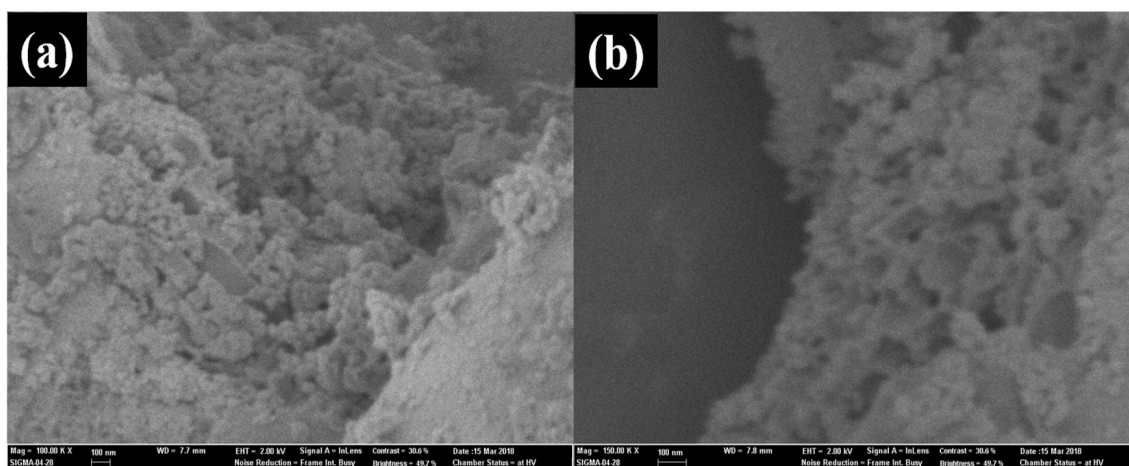

**Fig. S1** High resolution SEM images of (a) CNP-6 and (b) CNP-12 cerium oxide nanoparticles.
